# Supplementary material
Source: PubMed Central journal article supplement (PMC4244248)

**Modulation of mast cell proliferative and inflammatory responses by  
Leukotriene D<sub>4</sub> and Stem Cell Factor signaling interactions**

Nosayba Al-Azzam<sup>1</sup>, Vinay Kondeti<sup>1</sup>, Ernest Duah<sup>1</sup>, Farai Gombedza<sup>1</sup>, Charles K.  
Thodeti<sup>2</sup> and Sailaja Paruchuri<sup>1\*</sup>

<sup>1</sup> Department of Chemistry, University of Akron, Akron, OH, <sup>2</sup> Department of Integrative  
Medical Sciences, Northeast Ohio Medical University, Rootstown, OH

**\*Corresponding Author:**

Sailaja Paruchuri, PhD, Department of Chemistry, KNCL 406, 185 E Mill street, Akron,  
OH 44325; Phone: 3309722193; E-mail: [sp97@uakron.edu](mailto:sp97@uakron.edu)

Contract grant sponsor: NHLBI; Contract grant number: HL098953.

Contract grant sponsor: James Foght Assistant Professorship

## Supplementary figure legends

### **Supplementary figure 1. LTD<sub>4</sub> and SCF synergistically phosphorylate c-Kit in**

**BMMCs-** c-Kit phosphorylation and GAPDH levels in BMMC lysates were analyzed after treatment with 500 nM of LTC<sub>4</sub>, LTD<sub>4</sub> and LTE<sub>4</sub> in the presence or absence of 100ng/ml mouse SCF for 15 minutes. The data represents a representative blot of two experiments performed.

### **Supplementary figure 2. LTD<sub>4</sub> enhances SCF-mediated cell proliferation and SCF**

**potentiates LTD<sub>4</sub>-induced c-fos phosphorylation and expression in hMCs-** (A)

hMCs stimulated with 500 nM LTD<sub>4</sub> in the presence or absence of 100ng/ml SCF was measured by BrdU ELISA. Changes in cell proliferation were expressed as percentage of control. The data represents mean ± SEM of three separate experiments. Data was analyzed with student's t-test \*P<0.05. (B) MCs were treated with 500 nM LTD<sub>4</sub> and/or 100ng/ml of SCF for 1 h and the phospho, total c-fos and GAPDH levels were evaluated by western blotting. The data represents a representative blot of two experiments performed.

# Supplementary Figure 1

**BMMCs**

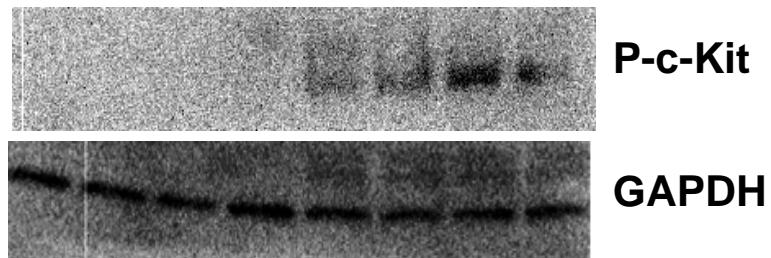

|   |   |   |   |   |   |   |   |                  |
|---|---|---|---|---|---|---|---|------------------|
| - | - | - | - | + | + | + | + | SCF              |
| - | + | - | - | - | + | - | - | LTC <sub>4</sub> |
| - | - | + | - | - | - | + | - | LTD <sub>4</sub> |
| - | - | - | + | - | - | - | + | LTE <sub>4</sub> |

## Supplementary Figure 2

A

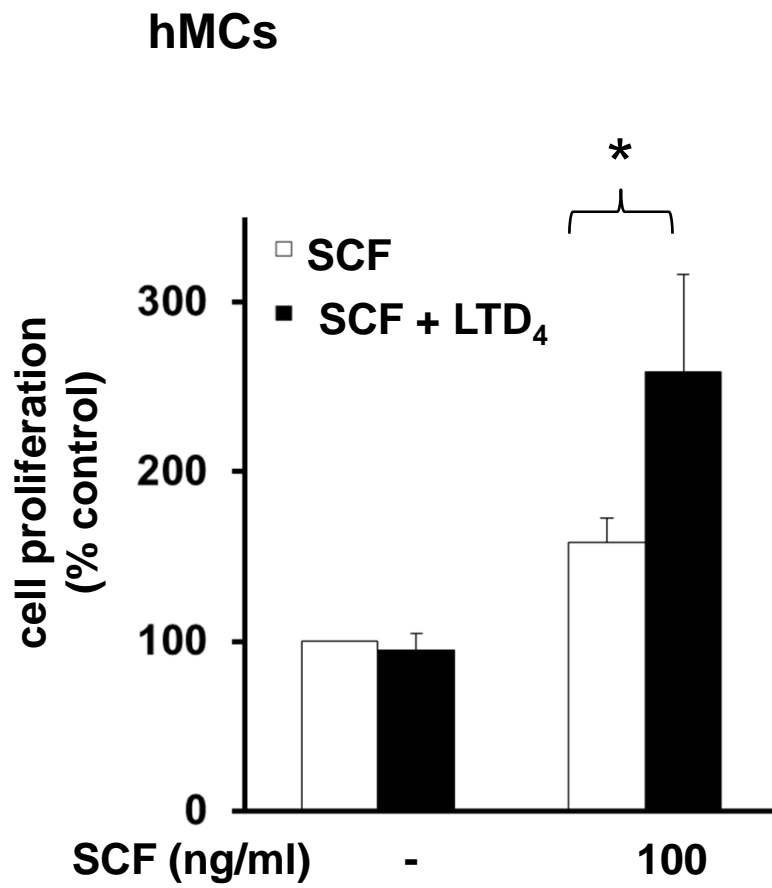

B

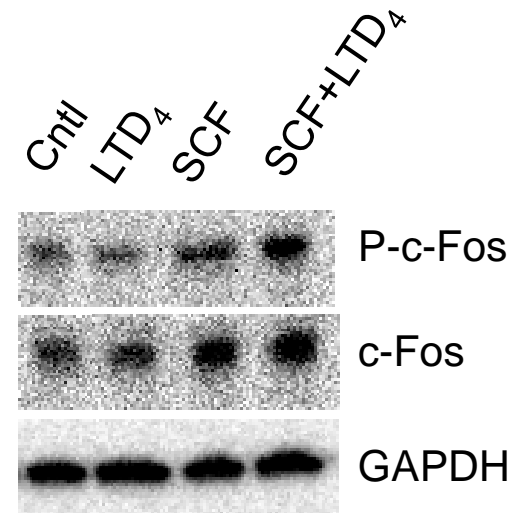

Supplement: NIHMS623320-supplement.pdf [file NIHMS623320-supplement.pdf]
